# Supplementary material
Source: publisher figshare collection journal article supplement (https://asha.figshare.com/articles/dataset/_/23504487)
Supplement: Supplementary file 1 [file 1]

**Supplemental Material S2.** Mean values, standard deviation, standard error and confidence interval for intelligibility score and listening difficulty for each conditions.

| Intelligibility (%)             | <i>IS</i> | <i>SD</i> | <i>SE</i> | CI   |
|---------------------------------|-----------|-----------|-----------|------|
| Normal                          | 0.76      | 0.43      | 0.01      | 0.02 |
| Dysphonic                       | 0.64      | 0.48      | 0.01      | 0.02 |
| Difficulty (%)                  | <i>LD</i> | <i>SD</i> | <i>SE</i> | CI   |
| Normal                          | 0.24      | 0.31      | 0.01      | 0.01 |
| Dysphonic                       | 0.40      | 0.39      | 0.01      | 0.02 |
| Intelligibility (%)             | <i>IS</i> | <i>SD</i> | <i>SE</i> | CI   |
| Grade II-III                    | 0.66      | 0.47      | 0.01      | 0.02 |
| Grade IV-V                      | 0.77      | 0.42      | 0.01      | 0.02 |
| Difficulty (%)                  | <i>LD</i> | <i>SD</i> | <i>SE</i> | CI   |
| Grade II-III                    | 0.35      | 0.38      | 0.01      | 0.01 |
| Grade IV-V                      | 0.25      | 0.31      | 0.01      | 0.01 |
| Intelligibility (%) - Normal    | <i>IS</i> | <i>SD</i> | <i>SE</i> | CI   |
| Grade II-III                    | 0.72      | 0.45      | 0.01      | 0.02 |
| Grade IV-V                      | 0.81      | 0.39      | 0.01      | 0.02 |
| Intelligibility (%) - Dysphonic | <i>IS</i> | <i>SD</i> | <i>SE</i> | CI   |
| Grade II-III                    | 0.58      | 0.49      | 0.02      | 0.03 |
| Grade IV-V                      | 0.72      | 0.45      | 0.02      | 0.03 |
| Difficulty (%) - Normal         | <i>LD</i> | <i>SD</i> | <i>SE</i> | CI   |
| Grade II-III                    | 0.28      | 0.35      | 0.01      | 0.02 |
| Grade IV-V                      | 0.19      | 0.25      | 0.01      | 0.01 |
| Difficulty (%) - Dysphonic      | <i>LD</i> | <i>SD</i> | <i>SE</i> | CI   |
| Grade II-III                    | 0.44      | 0.40      | 0.01      | 0.02 |
| Grade IV-V                      | 0.34      | 0.37      | 0.01      | 0.03 |
