# Supplementary material
Source: publisher figshare collection journal article supplement (https://asha.figshare.com/articles/dataset/_/23504487)
Supplement: Supplementary file 2 [file 1]

**Supplemental Material S1.** Acoustic parameters recorded in the six classrooms from each microphone and each noise condition.

| School | Classroom | Mic | Noise_Level | STI  | SNR   |
|--------|-----------|-----|-------------|------|-------|
| 1      | 1         | 1   | Quiet       | 0.67 | 22.09 |
| 1      | 1         | 1   | Low         | 0.41 | 3.62  |
| 1      | 1         | 1   | Mid         | 0.31 | -0.69 |
| 1      | 1         | 1   | High        | 0.26 | -2.79 |
| 1      | 1         | 2   | Quiet       | 0.62 | 19.44 |
| 1      | 1         | 2   | Low         | 0.40 | 1.36  |
| 1      | 1         | 2   | Mid         | 0.31 | -3.28 |
| 1      | 1         | 2   | High        | 0.27 | -5.80 |
| 1      | 1         | 3   | Quiet       | 0.61 | 20.70 |
| 1      | 1         | 3   | Low         | 0.41 | 4.17  |
| 1      | 1         | 3   | Mid         | 0.34 | 0.24  |
| 1      | 1         | 3   | High        | 0.23 | -3.57 |
| 1      | 1         | 4   | Quiet       | 0.63 | 22.26 |
| 1      | 1         | 4   | Low         | 0.47 | 4.35  |
| 1      | 1         | 4   | Mid         | 0.36 | -1.87 |
| 1      | 1         | 4   | High        | 0.31 | -3.99 |
| 1      | 1         | 5   | Quiet       | 0.66 | 18.93 |
| 1      | 1         | 5   | Low         | 0.49 | 4.74  |
| 1      | 1         | 5   | Mid         | 0.38 | 0.45  |
| 1      | 1         | 5   | High        | 0.30 | -2.46 |
| 1      | 1         | 6   | Quiet       | 0.69 | 22.60 |
| 1      | 1         | 6   | Low         | 0.55 | 8.70  |
| 1      | 1         | 6   | Mid         | 0.44 | 4.11  |
| 1      | 1         | 6   | High        | 0.38 | 1.65  |
| 1      | 2         | 1   | Quiet       | 0.60 | 20.63 |
| 1      | 2         | 1   | Low         | 0.48 | 11.28 |
| 1      | 2         | 1   | Mid         | 0.35 | 5.74  |
| 1      | 2         | 1   | High        | 0.27 | 1.71  |
| 1      | 2         | 2   | Quiet       | 0.53 | 16.49 |
| 1      | 2         | 2   | Low         | 0.46 | 8.48  |
| 1      | 2         | 2   | Mid         | 0.34 | 1.73  |
| 1      | 2         | 2   | High        | 0.27 | -1.51 |
| 1      | 2         | 3   | Quiet       | 0.54 | 15.69 |
| 1      | 2         | 3   | Low         | 0.44 | 6.47  |
| 1      | 2         | 3   | Mid         | 0.28 | 0.35  |
| 1      | 2         | 3   | High        | 0.20 | -4.23 |

|       |   |   |       |      |       |
|-------|---|---|-------|------|-------|
| 1     | 2 | 4 | Quiet | 0.53 | 15.39 |
| 1     | 2 | 4 | Low   | 0.41 | 5.26  |
| 1     | 2 | 4 | Mid   | 0.25 | -1.17 |
| 1     | 2 | 4 | High  | 0.19 | -4.93 |
| 1     | 2 | 5 | Quiet | 0.52 | 15.37 |
| 1     | 2 | 5 | Low   | 0.42 | 6.43  |
| 1     | 2 | 5 | Mid   | 0.29 | -0.29 |
| 1     | 2 | 5 | High  | 0.21 | -4.63 |
| 1     | 2 | 6 | Quiet | 0.56 | 18.71 |
| 1     | 2 | 6 | Low   | 0.41 | 6.42  |
| 1     | 2 | 6 | Mid   | 0.29 | 1.70  |
| 1     | 2 | 6 | High  | 0.21 | -2.97 |
| <hr/> |   |   |       |      |       |
| 2     | 3 | 1 | Quiet | 0.70 | 19.51 |
| 2     | 3 | 1 | Low   | 0.66 | 13.43 |
| 2     | 3 | 1 | Mid   | 0.58 | 8.23  |
| 2     | 3 | 1 | High  | 0.46 | 2.92  |
| 2     | 3 | 2 | Quiet | 0.65 | 15.22 |
| 2     | 3 | 2 | Low   | 0.53 | 6.27  |
| 2     | 3 | 2 | Mid   | 0.44 | 1.13  |
| 2     | 3 | 2 | High  | 0.35 | -3.29 |
| 2     | 3 | 3 | Quiet | 0.65 | 12.97 |
| 2     | 3 | 3 | Low   | 0.61 | 7.29  |
| 2     | 3 | 3 | Mid   | 0.52 | 1.92  |
| 2     | 3 | 3 | High  | 0.43 | -2.81 |
| 2     | 3 | 4 | Quiet | 0.62 | 12.20 |
| 2     | 3 | 4 | Low   | 0.54 | 6.82  |
| 2     | 3 | 4 | Mid   | 0.47 | 2.20  |
| 2     | 3 | 4 | High  | 0.39 | -2.16 |
| 2     | 3 | 5 | Quiet | 0.64 | 16.18 |
| 2     | 3 | 5 | Low   | 0.58 | 11.30 |
| 2     | 3 | 5 | Mid   | 0.54 | 7.99  |
| 2     | 3 | 5 | High  | 0.48 | 4.47  |
| 2     | 3 | 6 | Quiet | 0.68 | 19.02 |
| 2     | 3 | 6 | Low   | 0.61 | 12.76 |
| 2     | 3 | 6 | Mid   | 0.56 | 8.83  |
| 2     | 3 | 6 | High  | 0.48 | 4.65  |
| <hr/> |   |   |       |      |       |
| 2     | 4 | 1 | Quiet | 0.58 | 9.97  |
| 2     | 4 | 1 | Low   | 0.53 | 8.65  |
| 2     | 4 | 1 | Mid   | 0.44 | 5.41  |
| 2     | 4 | 1 | High  | 0.36 | 2.14  |

|       |   |   |       |      |       |
|-------|---|---|-------|------|-------|
| 2     | 4 | 2 | Quiet | 0.56 | 7.48  |
| 2     | 4 | 2 | Low   | 0.51 | 6.19  |
| 2     | 4 | 2 | Mid   | 0.45 | 4.04  |
| 2     | 4 | 2 | High  | 0.37 | 1.05  |
| 2     | 4 | 3 | Quiet | 0.57 | 11.08 |
| 2     | 4 | 3 | Low   | 0.52 | 7.95  |
| 2     | 4 | 3 | Mid   | 0.43 | 2.71  |
| 2     | 4 | 3 | High  | 0.34 | -1.28 |
| 2     | 4 | 4 | Quiet | 0.55 | 10.12 |
| 2     | 4 | 4 | Low   | 0.48 | 8.54  |
| 2     | 4 | 4 | Mid   | 0.43 | 5.61  |
| 2     | 4 | 4 | High  | 0.31 | 0.65  |
| 2     | 4 | 5 | Quiet | 0.58 | 8.84  |
| 2     | 4 | 5 | Low   | 0.57 | 7.82  |
| 2     | 4 | 5 | Mid   | 0.48 | 4.92  |
| 2     | 4 | 5 | High  | 0.39 | 1.47  |
| 2     | 4 | 6 | Quiet | 0.55 | 5.64  |
| 2     | 4 | 6 | Low   | 0.50 | 4.43  |
| 2     | 4 | 6 | Mid   | 0.42 | 2.24  |
| 2     | 4 | 6 | High  | 0.33 | -0.32 |
| <hr/> |   |   |       |      |       |
| 2     | 5 | 1 | Quiet | 0.67 | 15.15 |
| 2     | 5 | 1 | Low   | 0.58 | 14.71 |
| 2     | 5 | 1 | Mid   | 0.49 | 10.43 |
| 2     | 5 | 1 | High  | 0.46 | 8.93  |
| 2     | 5 | 2 | Quiet | 0.60 | 7.54  |
| 2     | 5 | 2 | Low   | 0.55 | 6.20  |
| 2     | 5 | 2 | Mid   | 0.43 | 4.76  |
| 2     | 5 | 2 | High  | 0.32 | 3.00  |
| 2     | 5 | 3 | Quiet | 0.60 | 12.34 |
| 2     | 5 | 3 | Low   | 0.44 | 7.43  |
| 2     | 5 | 3 | Mid   | 0.23 | 1.19  |
| 2     | 5 | 3 | High  | 0.24 | -2.87 |
| 2     | 5 | 4 | Quiet | 0.47 | 7.63  |
| 2     | 5 | 4 | Low   | 0.40 | 6.64  |
| 2     | 5 | 4 | Mid   | 0.29 | 4.22  |
| 2     | 5 | 4 | High  | 0.23 | 1.26  |
| 2     | 5 | 5 | Quiet | 0.58 | 12.30 |
| 2     | 5 | 5 | Low   | 0.49 | 10.58 |
| 2     | 5 | 5 | Mid   | 0.38 | 7.15  |
| 2     | 5 | 5 | High  | 0.30 | 2.92  |

|   |   |   |       |      |       |
|---|---|---|-------|------|-------|
| 2 | 5 | 6 | Quiet | 0.51 | 9.04  |
| 2 | 5 | 6 | Low   | 0.41 | 5.88  |
| 2 | 5 | 6 | Mid   | 0.28 | 1.01  |
| 2 | 5 | 6 | High  | 0.20 | -2.92 |
| 2 | 6 | 1 | Quiet | 0.69 | 11.19 |
| 2 | 6 | 1 | Low   | 0.48 | 9.05  |
| 2 | 6 | 1 | Mid   | 0.30 | 4.69  |
| 2 | 6 | 1 | High  | 0.25 | 1.51  |
| 2 | 6 | 2 | Quiet | 0.63 | 22.12 |
| 2 | 6 | 2 | Low   | 0.56 | 12.72 |
| 2 | 6 | 2 | Mid   | 0.37 | 8.38  |
| 2 | 6 | 2 | High  | 0.35 | 5.30  |
| 2 | 6 | 3 | Quiet | 0.67 | 16.47 |
| 2 | 6 | 3 | Low   | 0.61 | 12.27 |
| 2 | 6 | 3 | Mid   | 0.49 | 6.06  |
| 2 | 6 | 3 | High  | 0.42 | 2.53  |
| 2 | 6 | 4 | Quiet | 0.66 | 19.59 |
| 2 | 6 | 4 | Low   | 0.54 | 10.77 |
| 2 | 6 | 4 | Mid   | 0.36 | 3.76  |
| 2 | 6 | 4 | High  | 0.31 | 0.16  |
| 2 | 6 | 5 | Quiet | 0.67 | 16.96 |
| 2 | 6 | 5 | Low   | 0.62 | 13.30 |
| 2 | 6 | 5 | Mid   | 0.50 | 8.04  |
| 2 | 6 | 5 | High  | 0.43 | 4.70  |
| 2 | 6 | 6 | Quiet | 0.73 | 20.13 |
| 2 | 6 | 6 | Low   | 0.68 | 15.99 |
| 2 | 6 | 6 | Mid   | 0.55 | 10.08 |
| 2 | 6 | 6 | High  | 0.45 | 6.08  |
